# Supplementary material
Source: MDPI journal article supplement (https://www.mdpi.com/2073-4433/15/2/179)
Supplement: s1 [file s1]

---

# Supplementary Materials: Investigating the Complexities of VOC Sources in Mexico City in the Years 2016–2022

Mohammad Jahirul Alam <sup>1,2</sup>, Bernhard Rappenglueck <sup>1,2,\*</sup>, Armando Retama <sup>3</sup> and Olivia Rivera-Hernández <sup>4</sup>

<sup>1</sup> Department of Earth and Atmospheric Sciences, University of Houston, Houston, TX 77204, USA; malam22@cougarnet.uh.edu

<sup>2</sup> Institute for Climate and Atmospheric Science, University of Houston, Houston, TX 77204, USA

<sup>3</sup> Independent Researcher, Mexico City C.P. 06000, Mexico; armando.retama@gmail.com

<sup>4</sup> Dirección de Monitoreo de Calidad del Aire, Secretaría del Medio Ambiente, Mexico City C.P. 06000, Mexico; orivera@sedema.cdmx.gob.mx

\* Correspondence: brappenglueck@uh.edu

2016

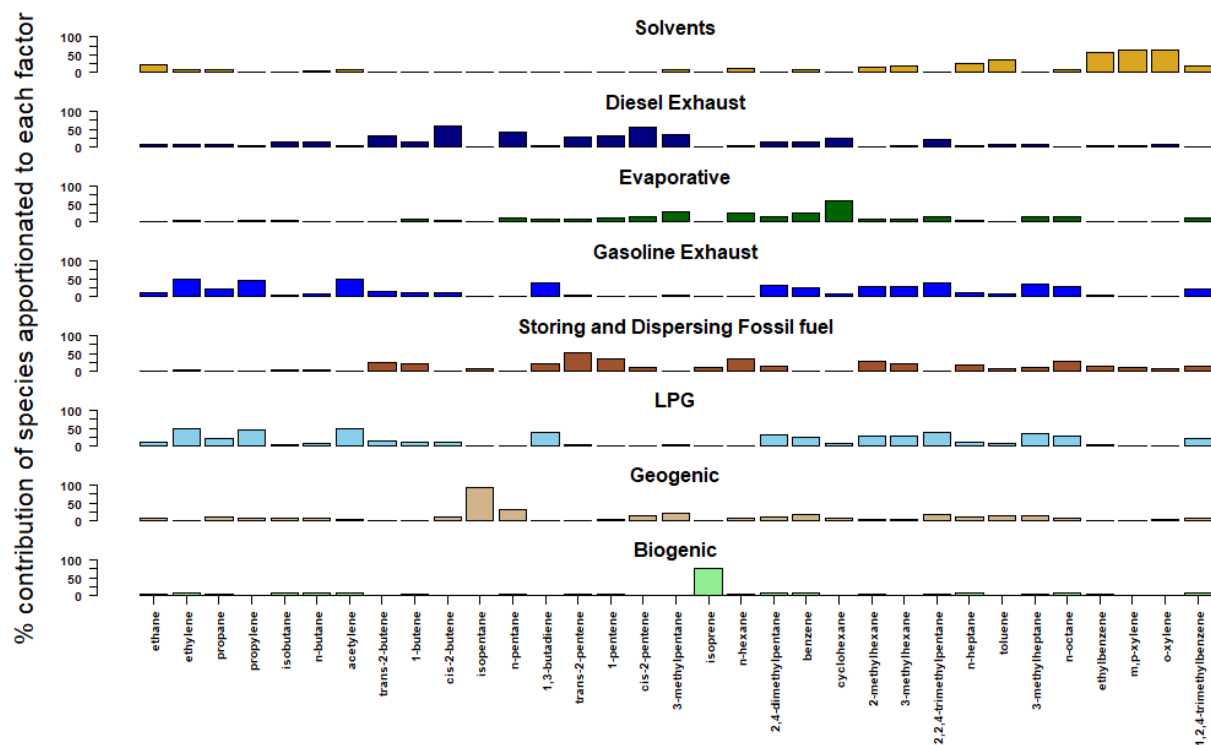

**Figure S1.** Profiles of source factors determined for VOCs by PMF for the month of May 2016. .

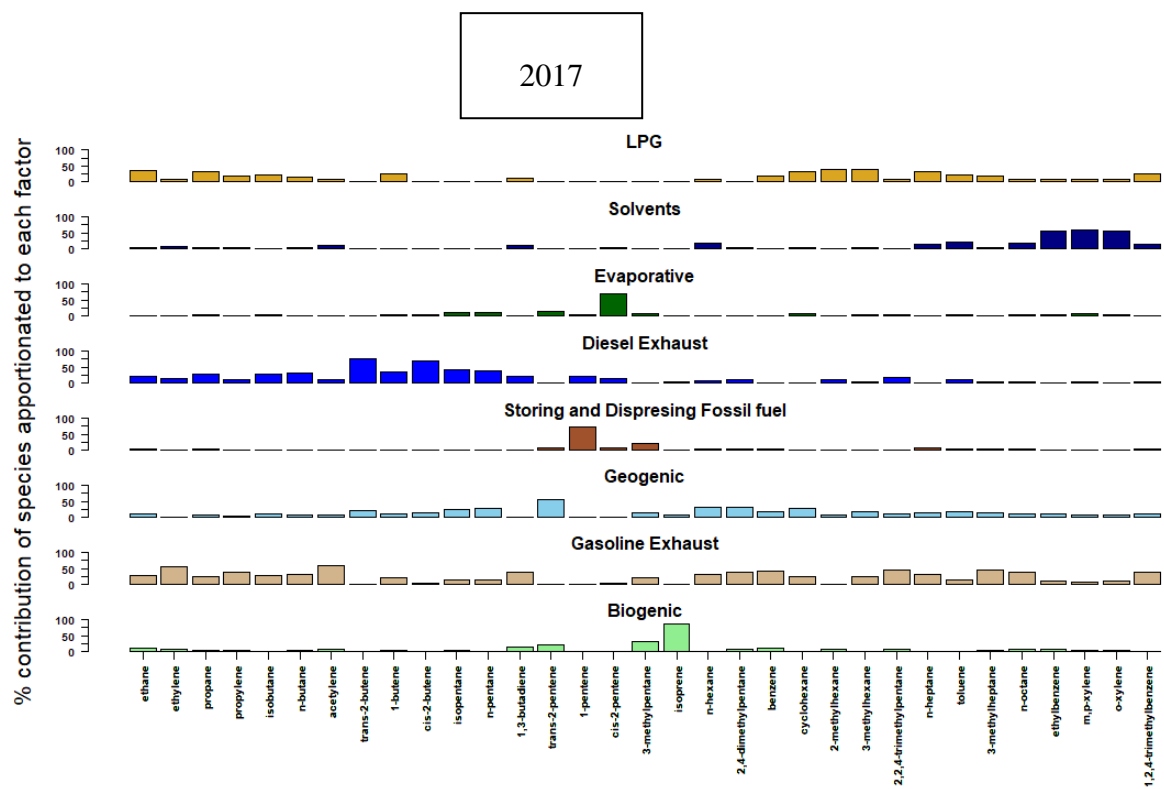

**Figure S2.** Profiles of source factors determined for VOCs by PMF for the month of May 2017. .

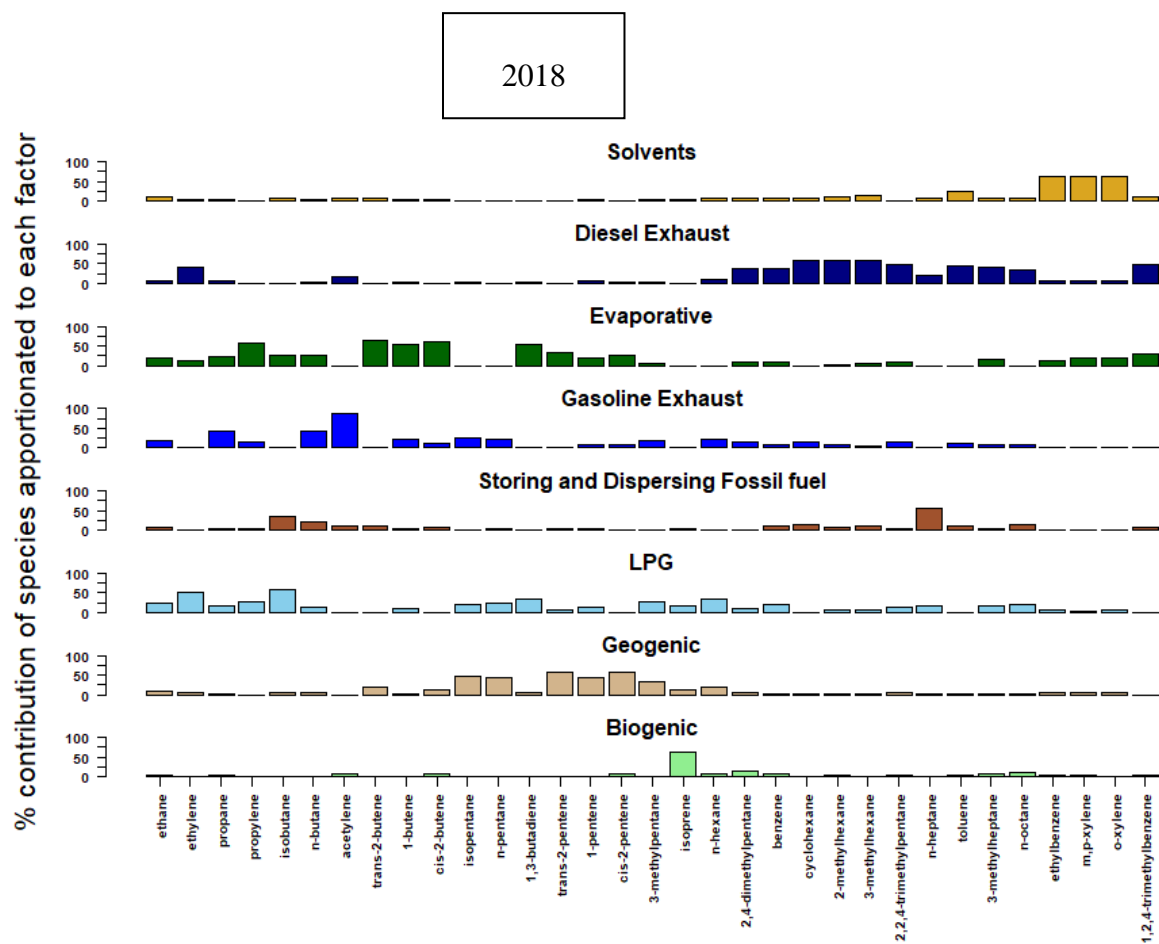

**Figure S3.** Profiles of source factors determined for VOCs by PMF for the month of May 2018. .

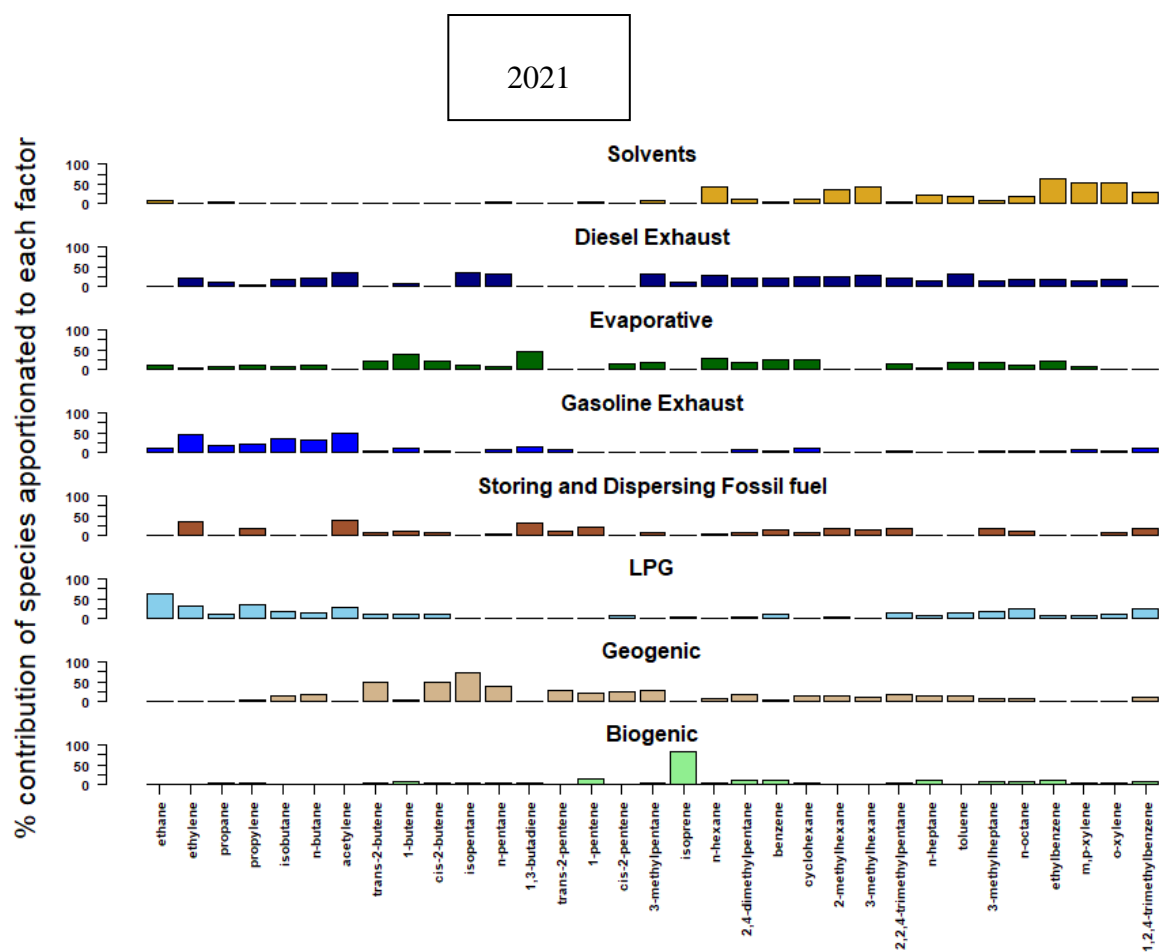

**Figure S4.** Profiles of source factors determined for VOCs by PMF for the month of May 2021.

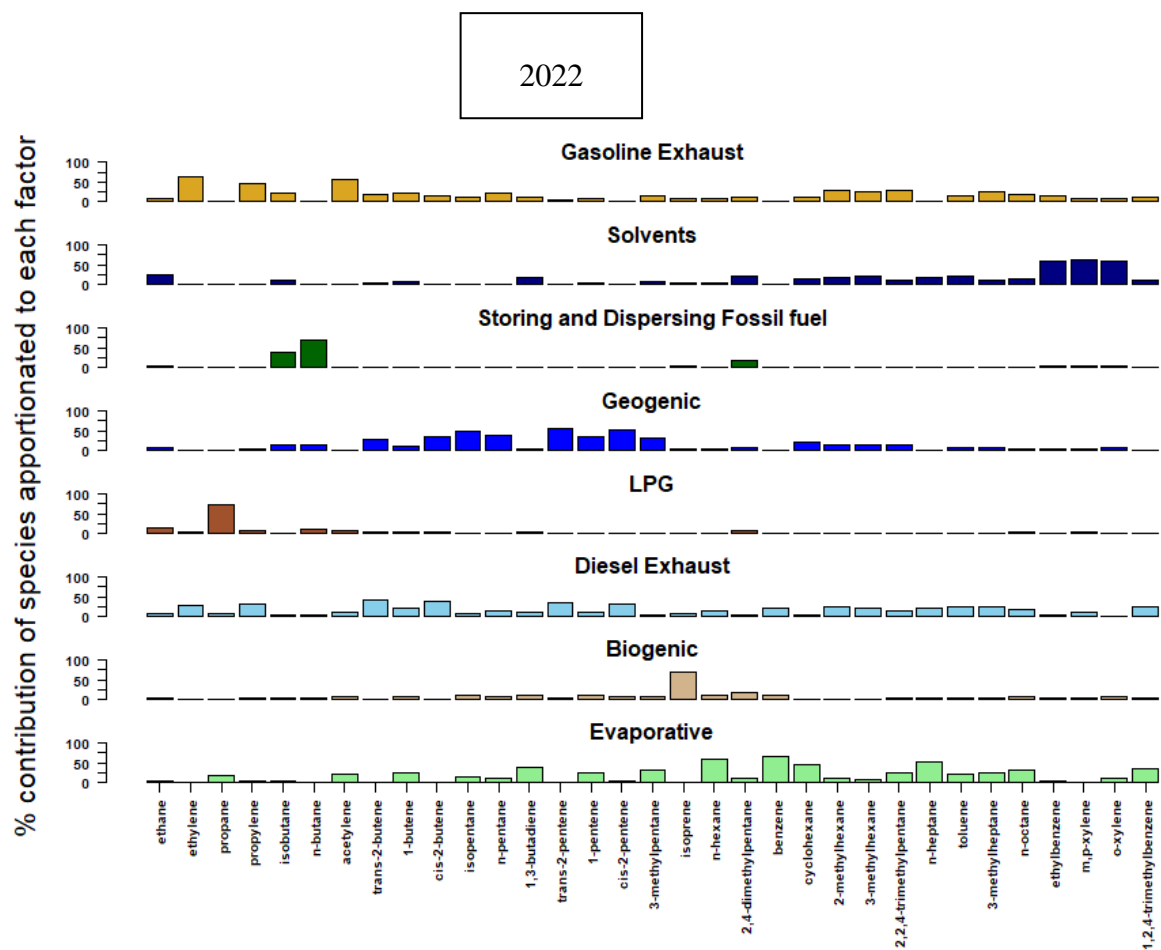

**Figure S5.** Profiles of source factors determined for VOCs by PMF for the month of May 2022.

**Table S1.** Summary of PMF runs for seven, eight, and nine-factor solutions.

| Diagnostic                      | 7 factors | 8 factors | 9 factors |
|---------------------------------|-----------|-----------|-----------|
| $Q_{\text{exp}}$                | 788       | 716       | 644       |
| $Q_{\text{rob}}$                | 82199.7   | 71277.7   | 53921.2   |
| $Q_{\text{true}}$               | 98982.2   | 86238.7   | 62359     |
| $Q_{\text{rob}}/Q_{\text{exp}}$ | 104.3     | 99.54     | 83.72     |
| DISP % dQ                       | 0         | 0         | 0         |
| DISP swaps                      | 0         | 0         | 0         |
| BS mapping (%)                  | <60%      | <75%      | >80%      |
| Unmapping                       | 0         | 0         | 0         |

**Table S2.** Bootstrap analysis results for 9 factors (F) solution based on 20 bootstrap runs.

|          | F 1 | F 2 | F 3 | F 4 | F 5 | F 6 | F 7 | F 8 | F 9 |
|----------|-----|-----|-----|-----|-----|-----|-----|-----|-----|
| Boot F 1 | 20  | 0   | 0   | 0   | 0   | 0   | 0   | 0   | 0   |
| Boot F 2 | 0   | 20  | 0   | 0   | 0   | 0   | 0   | 0   | 0   |
| Boot F 3 | 0   | 0   | 20  | 0   | 0   | 0   | 0   | 0   | 0   |
| Boot F 4 | 0   | 0   | 0   | 20  | 0   | 0   | 0   | 0   | 0   |
| Boot F 5 | 0   | 0   | 0   | 0   | 20  | 0   | 0   | 0   | 0   |
| Boot F 6 | 0   | 0   | 0   | 0   | 0   | 20  | 0   | 0   | 0   |
| Boot F 7 | 0   | 0   | 0   | 0   | 0   | 0   | 20  | 0   | 0   |
| Boot F 8 | 0   | 0   | 0   | 0   | 0   | 0   | 0   | 20  | 0   |
| Boot F 9 | 0   | 0   | 0   | 0   | 0   | 0   | 0   | 0   | 20  |

**Table S3 Statistical parameters for VOCs, NO, NO<sub>2</sub>, CO, and SO<sub>2</sub>.** VOCs are ordered according to their elution in the gas chromatogram. Data in ppb for VOCs, NO, NO<sub>x</sub>, CO, SO<sub>2</sub> and µg/m<sup>3</sup> for PM<sub>1</sub>.

| Index | Variable               | Mean  | SD     | Median | Max   | Min |
|-------|------------------------|-------|--------|--------|-------|-----|
| 1     | ethane                 | 5.63  | 4.67   | 3.86   | 30.6  | 1.1 |
| 2     | ethylene               | 5.86  | 5.51   | 4.20   | 37.2  | 0.2 |
| 3     | propane                | 52.05 | 52.80  | 33.27  | 322.1 | 3.0 |
| 4     | propylene              | 2.31  | 2.38   | 1.45   | 16.1  | 0.1 |
| 5     | isobutane              | 4.13  | 4.0    | 2.65   | 25.7  | 0.4 |
| 6     | n-butane               | 8.65  | 8.55   | 5.48   | 53.7  | 0.8 |
| 7     | acetylene              | 4.63  | 4.39   | 3.22   | 33.5  | 0.4 |
| 8     | trans-2-butene         | 0.28  | 0.32   | 0.15   | 2.1   | bdl |
| 9     | 1-butene               | 0.36  | 0.34   | 0.25   | 2.3   | bdl |
| 10    | cis-2-butene           | 0.25  | 0.31   | 0.13   | 2.1   | bdl |
| 11    | isopentane             | 5.20  | 4.82   | 3.94   | 35.8  | 0.7 |
| 12    | n-pentane              | 2.26  | 2.22   | 1.61   | 13.9  | bdl |
| 13    | 1,3-butadiene          | 0.26  | 0.27   | 0.17   | 2.0   | bdl |
| 14    | trans-2-pentene        | 0.15  | 0.16   | 0.10   | 1.4   | bdl |
| 15    | 1-pentene              | 0.09  | 0.08   | 0.07   | 0.6   | bdl |
| 16    | cis-2-pentene          | 0.07  | 0.08   | 0.04   | 0.6   | bdl |
| 17    | 3-methylpentane        | 0.62  | 0.57   | 0.47   | 3.6   | bdl |
| 18    | isoprene               | 0.14  | 0.10   | 0.12   | 1.0   | bdl |
| 19    | n-hexane               | 1.04  | 0.97   | 0.78   | 8.0   | bdl |
| 20    | 2,4-dimethylpentane    | 0.2   | 0.19   | 0.165  | 1.3   | bdl |
| 21    | benzene                | 0.64  | 0.52   | 0.52   | 3.8   | bdl |
| 22    | cyclohexane            | 0.25  | 0.23   | 0.19   | 1.8   | bdl |
| 23    | 2-methylhexane         | 0.38  | 0.34   | 0.28   | 2.5   | bdl |
| 24    | 3-methylhexane         | 0.41  | 0.37   | 0.30   | 2.9   | bdl |
| 25    | 2,2,4-trimethylpentane | 0.78  | 0.73   | 0.55   | 5.0   | bdl |
| 26    | n-heptane              | 0.55  | 0.53   | 0.4    | 4.4   | bdl |
| 27    | toluene                | 5.44  | 4.94   | 3.91   | 44.3  | 0.3 |
| 28    | 3-methylheptane        | 0.1   | 0.09   | 0.08   | 0.7   | bdl |
| 29    | n-octane               | 0.23  | 0.17   | 0.19   | 1.2   | bdl |
| 30    | ethylbenzene           | 0.78  | 0.69   | 0.57   | 5.6   | bdl |
| 31    | m,p-xylene             | 2.24  | 2.06   | 1.63   | 15.8  | 0.2 |
| 32    | o-xylene               | 0.90  | 0.82   | 0.65   | 6.3   | bdl |
| 33    | 1,2,4-trimethylbenzene | 0.50  | 0.41   | 0.39   | 3.1   | bdl |
| 34    | CO                     | 639.3 | 499.94 | 500    | 3610  | 10  |
| 35    | NO                     | 27.6  | 49.0   | 5.4    | 408   | bdl |
| 36    | NO <sub>2</sub>        | 34.8  | 18.1   | 35.0   | 106   | 2   |
| 37    | SO <sub>2</sub>        | 22.5  | 14.5   | 22.3   | 77    | bdl |
| 38    | PM <sub>1</sub>        | 20.01 | 4.77   | 19.30  | 31.0  | 6.6 |

bdl = below detection limit; Nbdl: Number of samples bdl.
